# Supplementary material for: PACE-IT study protocol: a stepped wedge cluster randomised controlled trial evaluating the implementation of telehealth visual assessment in emergency care for people living in residential aged-care facilities
Source: PubMed Central journal article supplement (PMC7372753; doi:10.1186/s12913-020-05539-1), 2020-07-20

# PACE-IT Survey

Page 1

## PACE-IT Research Project Staff Survey

You are invited to take part in a survey related to the Visual Telehealth Aged Care Emergency (ACE) call you had recently.

Participation in this survey is voluntary and all information provided is anonymous.

Your participation in this survey will assist our team to evaluate the Visual Telehealth ACE call process and inform improvement strategies.

The survey should take less than 5 minutes to complete.

---

## Section 1. Demographic information

Please select the response that applies to you

1. Gender\*
  - Male
  - Female
  - Prefer not to answer
  
2. Age\*
  - 30 years or less
  - 31-40 years
  - 41-50 years
  - 51-60 years
  - Over 60 years
  
3. What is your main role at the RACF?\*
  - Registered Nurse
  - Enrolled Nurse
  - Assistant in Nursing
  - Manager
  - Administration staff
  
4. Do you speak a language other than English at home?\*
  - No
  - Yes
  
5. How well do you speak/write English?\*
  - Very well
  - Well
  - Not well

## Section 2. About the Visual Telehealth ACE call

Please select or enter the response that applies to you

6. I have attended the following Visual Telehealth ACE call training programs: [comprising - 1) face to face education session at the RACF, 2) a visit to ED]\*
- Face to face education session
  - ED site visit
  - Both
  - Neither

**Your response indicates that you have had no Visual Telehealth ACE call training. If you would like training, please call Carla Sunner on 02 4024 6720. Or email [Carla.Sunner@health.nsw.gov.au](mailto:Carla.Sunner@health.nsw.gov.au).**

7. What was the length of your latest Visual Telehealth ACE call in minutes?\*
- The response must be in whole minutes (eg 1 hr 15 mins should be entered as 75).  
The value must be between 5 and 90, inclusive.

8. Overall, how many times have you participated in the Visual Telehealth ACE call to discuss a resident's clinical issue?\*
- First time
  - 2-4 times
  - 5-10 times
  - more than 10 times

9. Which RACF were you working in when you participated in your most recent Visual Telehealth ACE call?\*

## Section 3. Technology, Quality, Accessibility and Adaptability

This is about your experiences using a Visual Telehealth ACE call.

Please respond to the following statements by rating your level of agreement with each.

### 10. Technology and Quality\*

|                                                                 | Strongly Agree        | Agree                 | Neutral               | Disagree              | Strongly Disagree     |
|-----------------------------------------------------------------|-----------------------|-----------------------|-----------------------|-----------------------|-----------------------|
| 1. The Visual Telehealth ACE call was easy to set up            | <input type="radio"/> | <input type="radio"/> | <input type="radio"/> | <input type="radio"/> | <input type="radio"/> |
| 2. The Visual Telehealth ACE call was easy to use               | <input type="radio"/> | <input type="radio"/> | <input type="radio"/> | <input type="radio"/> | <input type="radio"/> |
| 3. The quality of the Visual Telehealth ACE call was acceptable | <input type="radio"/> | <input type="radio"/> | <input type="radio"/> | <input type="radio"/> | <input type="radio"/> |

### 11. Accessibility and Adaptability\*

|                                                                                                      | Strongly Agree        | Agree                 | Neutral               | Disagree              | Strongly Disagree     |
|------------------------------------------------------------------------------------------------------|-----------------------|-----------------------|-----------------------|-----------------------|-----------------------|
| 1. The Visual Telehealth ACE call was too time consuming compared to a normal ACE phone call         | <input type="radio"/> | <input type="radio"/> | <input type="radio"/> | <input type="radio"/> | <input type="radio"/> |
| 2. I have received good support from our facility champion in the use of Visual Telehealth ACE calls | <input type="radio"/> | <input type="radio"/> | <input type="radio"/> | <input type="radio"/> | <input type="radio"/> |
| 3. The training I received in the use of Visual Telehealth ACE calls has been adequate               | <input type="radio"/> | <input type="radio"/> | <input type="radio"/> | <input type="radio"/> | <input type="radio"/> |

Your response indicates that you have had a problem with one or more of the Technology, Quality, Accessibility or Adaptability aspects while using Visual Telehealth ACE calls. If you would like advice or assistance, please call Carla Sunner on 02 4924 6720. Or email [Carla.Sunner@health.nsw.gov.au](mailto:Carla.Sunner@health.nsw.gov.au).

## Section 4. Usefulness and Engagement

Please respond to the following statements by rating your level of agreement with each.

### 12. Usefulness \*

|                                                                                                                   | Strongly Agree        | Agree                 | Neutral               | Disagree              | Strongly Disagree     |
|-------------------------------------------------------------------------------------------------------------------|-----------------------|-----------------------|-----------------------|-----------------------|-----------------------|
| 1. The Visual Telehealth ACE call enhanced communication between myself, the resident/carers and the ED clinician | <input type="radio"/> | <input type="radio"/> | <input type="radio"/> | <input type="radio"/> | <input type="radio"/> |
| 2. I believe the Visual Telehealth ACE call provided a more person-centred approach for the resident              | <input type="radio"/> | <input type="radio"/> | <input type="radio"/> | <input type="radio"/> | <input type="radio"/> |
| 3. I was satisfied with the agreed resident management/care plan generated from the Visual Telehealth ACE call    | <input type="radio"/> | <input type="radio"/> | <input type="radio"/> | <input type="radio"/> | <input type="radio"/> |

13. Your response indicates that you have had a problem with the Usefulness of Visual Telehealth ACE calls.  
 We value your opinion and would like to help solve any problems you are experiencing.  
 Please enter comments about your experiences using Visual Telehealth ACE calls so we can address these issues.

Please follow the ISBAR framework for your response:

- Introduction
- Situation
- Background
- Assessment
- Recommendation

### 14. Engagement\*

|                                                                            | Strongly Agree        | Agree                 | Neutral               | Disagree              | Strongly Disagree     |
|----------------------------------------------------------------------------|-----------------------|-----------------------|-----------------------|-----------------------|-----------------------|
| 1. My overall Visual Telehealth ACE call experience was positive           | <input type="radio"/> | <input type="radio"/> | <input type="radio"/> | <input type="radio"/> | <input type="radio"/> |
| 2. I will use the Visual Telehealth ACE call process again                 | <input type="radio"/> | <input type="radio"/> | <input type="radio"/> | <input type="radio"/> | <input type="radio"/> |
| 3. I will recommend the use of Visual Telehealth ACE calls to other people | <input type="radio"/> | <input type="radio"/> | <input type="radio"/> | <input type="radio"/> | <input type="radio"/> |

Your response indicates that you have experienced a problem using Visual Telehealth ACE calls. If you would like advice or assistance, please call Carla Sunner on 02 4924 6720. Or email [Carla.Sunner@health.nsw.gov.au](mailto:Carla.Sunner@health.nsw.gov.au).

## Comments

15. Please provide any comments or suggestions that can improve the use of the Visual Telehealth ACE call to manage the situation for residents.

If you have an issue or a matter that you would like to discuss further with us, please contact the PACE-IT Research Team on 02 4924 6720.

Michelle Giles  
Manager, HNE Nursing and Midwifery Research Centre  
Email: michelle.giles@health.nsw.gov.au  
or  
Carla Sunner  
PACE-IT Project Manager  
Email: Carla.sunner@health.nsw.gov.au

Thank you  
PACE-IT Research team

**Thank you for completing the survey.**

**Your answers will now be saved, by clicking Submit.**

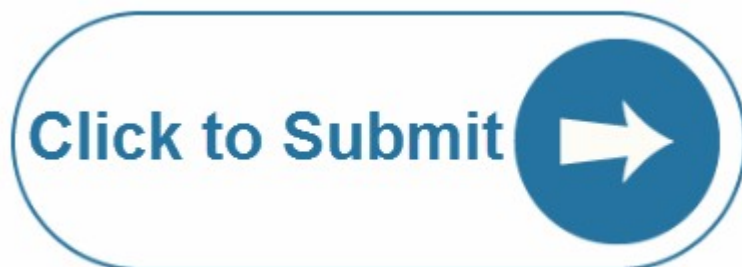

Supplement: 12913_2020_5539_MOESM1_ESM.pdf [file 12913_2020_5539_MOESM1_ESM.pdf]
